# Supplementary material for: β-Glycosidase sensitive oral nanoparticles for combined photothermal and chemo treatment of colorectal cancer
Source: Royal Society of Chemistry journal article supplement (doi:10.1039/d3tb02393a), 2024-01-01
Supplement: d3tb02393a1.pdf [file d3tb02393a1.pdf]

## **$\beta$ -Glycosidase Sensitive Oral Nanoparticles for Combined Photothermal and Chemo Treatment of Colorectal Cancer**

Jingning Zhou<sup>a,1</sup>, Zequn Zhuang<sup>a,1</sup>, Rui Gao<sup>b</sup>, Ran Li<sup>c</sup>, Yigang Chen<sup>a,\*</sup>

<sup>a</sup> Department of General Surgery, The Affiliated Wuxi No. 2 People's Hospital of Nanjing Medical University, Wuxi, 214002, Jiangsu, China

<sup>b</sup> School of Pharmacy, China Pharmaceutical University, Nanjing, 211100, Jiangsu, China

<sup>c</sup> School of Pharmacy, Jiangsu University, Zhenjiang, 212013, Jiangsu, China

<sup>1</sup>These authors contributed equally to this work and should be considered co-first authors.

**\*Correspondence:** Yigang Chen, E-mail: 9862023226@jiangnan.edu.cn

**Address:** Department of General Surgery, The Affiliated Wuxi No. 2 People's Hospital of Nanjing Medical University, 68 Zhongshan Road, Wuxi 214002, Jiangsu, China

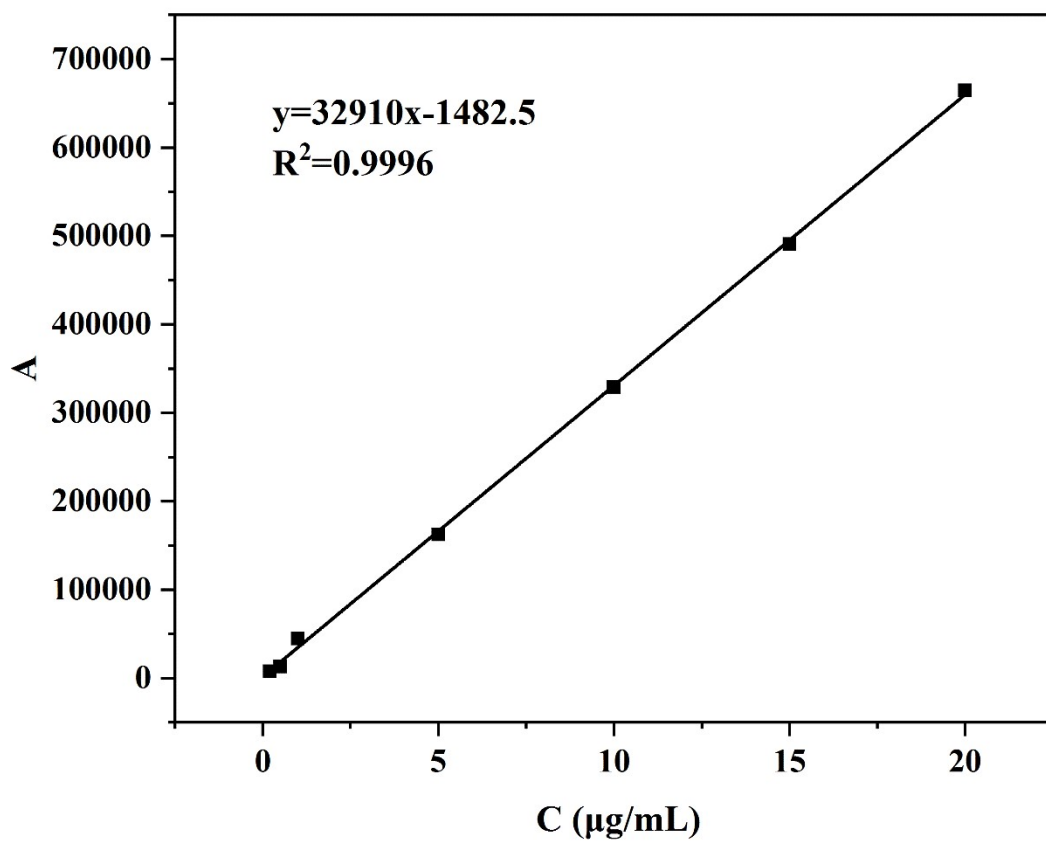

Fig. S1 Standard HPLC curve of 5-FU.

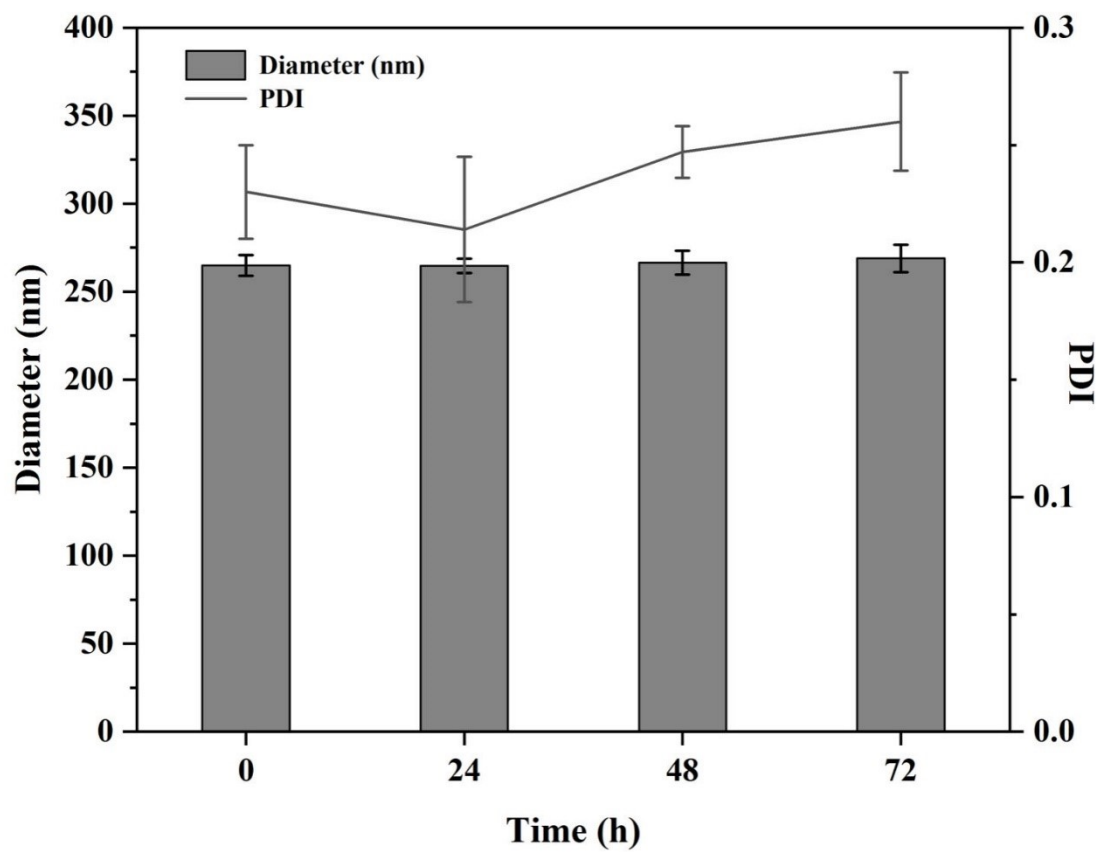

Figure. S2 Particle size and PDI value of BiNS@RHL-CS NPs within 72 h.

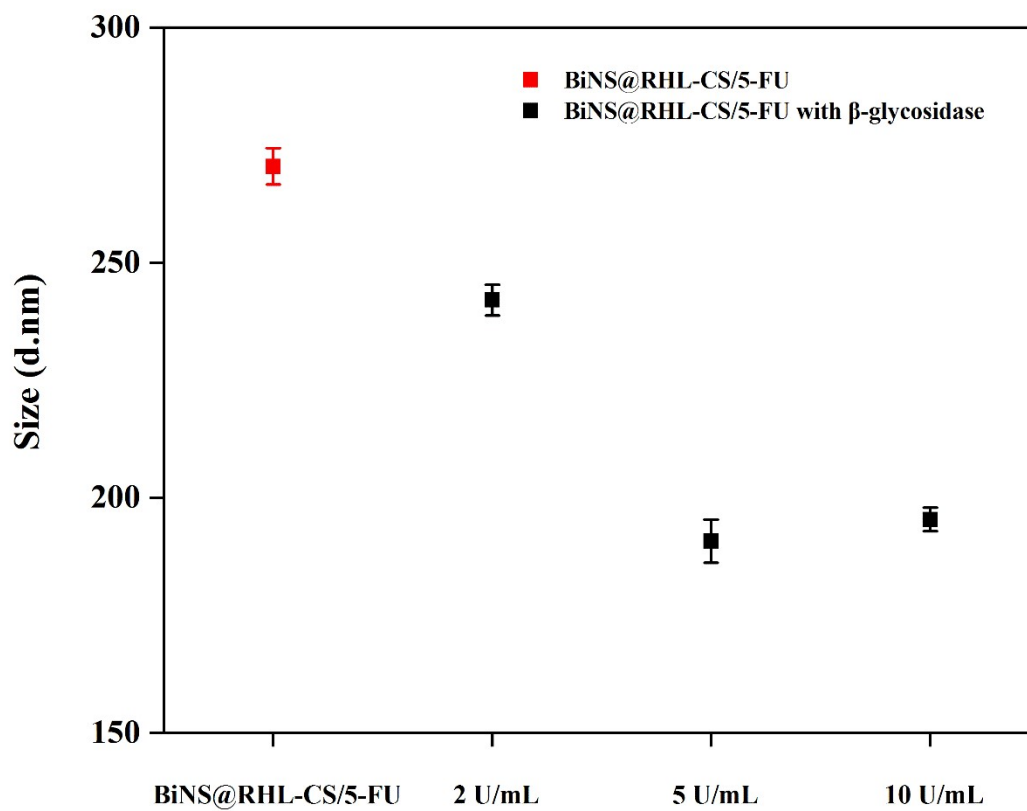

Fig. S3 The changes in particle size of BiNS@RHL-CS/5-FU NPs treated with different concentrations of  $\beta$ -glycosidase, n=3.

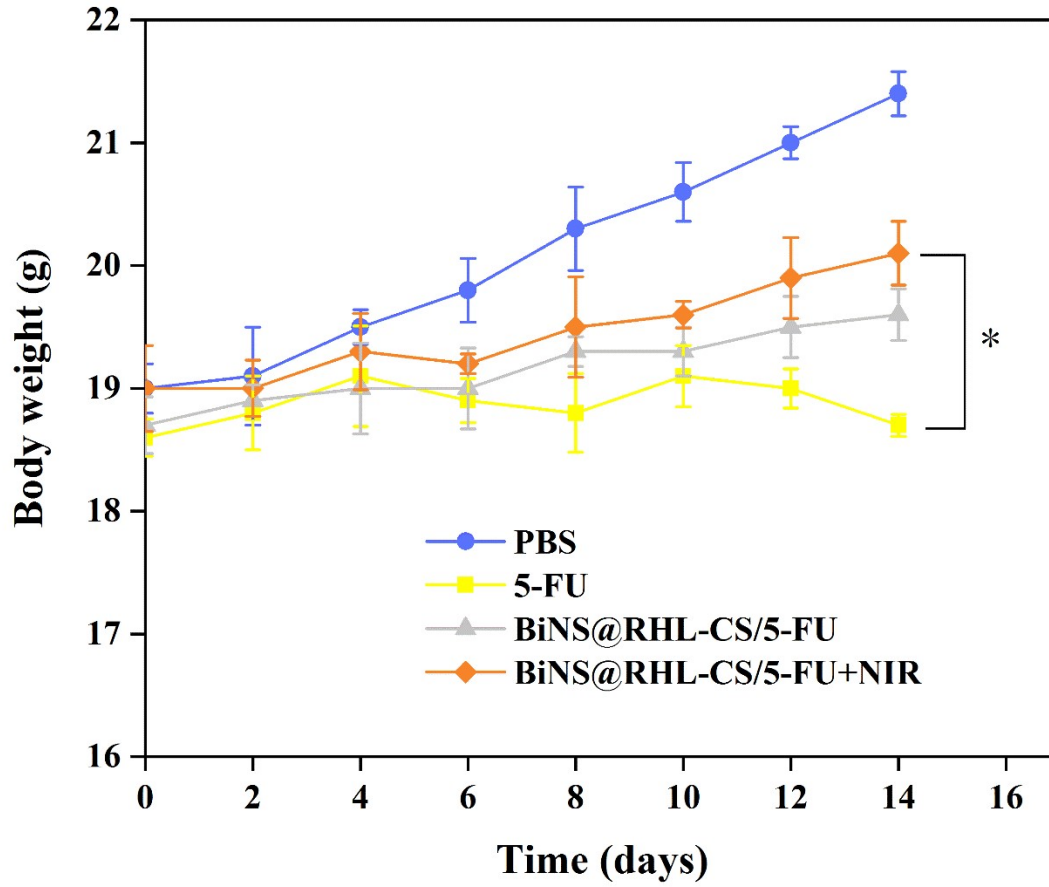

Fig. S4 Weight change curve of mice within 14 days, n=5, \*p<0.05

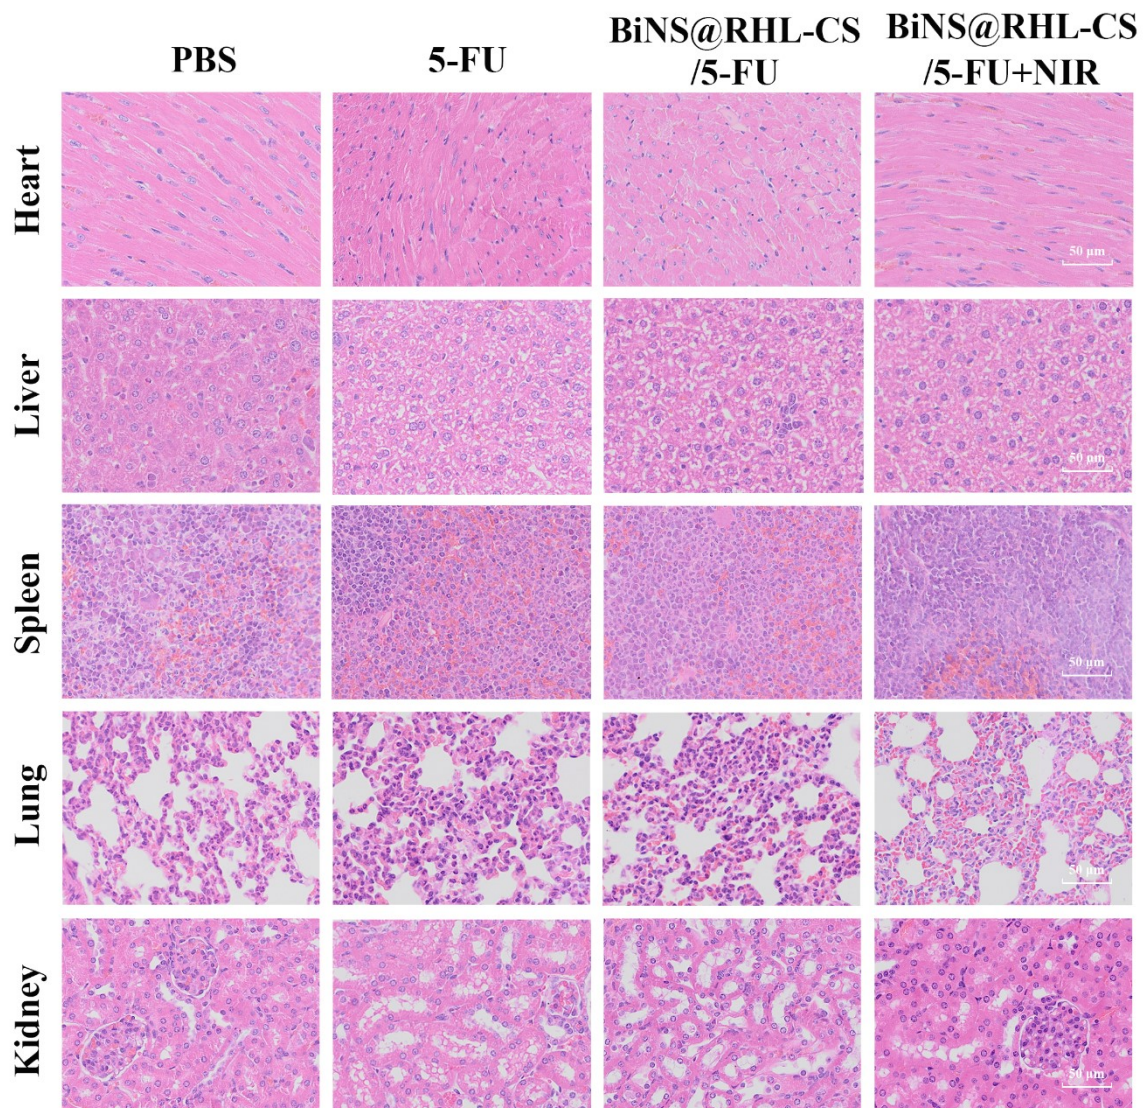

Fig. S5 H&E staining of heart, liver, spleen, lung and kidney dissected at the end of the treatment. Scale bar was 50 $\mu$ m.
